# Supplementary material for: Fluorescent Labeling of Peroxisome and Nuclear in Colletotrichum aenigma
Source: MDPI journal article supplement (doi:10.3390/jof9040493), 2023-04-21
Supplement: s1 [file s1]

Table S1. Primers used in this work.

| Names       | Sequences                      | Amplicons and lengths                  |
|-------------|--------------------------------|----------------------------------------|
| HPH52       | 5'-AGCTGCGCCGATGGTTTCTACAA-3'  | HPH gene fragment, 585 bp              |
| HPH34       | 5'-GCGCGTCTGCTGCTCCATACAA-3'   |                                        |
| MPG11       | 5'-TCACGACTGGGAGTAGAAAGA-3'    | Fragment of MPG1 gene promoter, 976 bp |
| MPG12       | 5'-CCAGATTCCAGGGTTGCTAAA-3'    |                                        |
| GFP-CHK1    | 5'-GCCACCTACGGCAAGCTGACCCTG-3' | GFP gene fragment, 502 bp              |
| GFP-CHK2    | 5'-GGGTGCTCAGGTAGTGGTTGTCCG-3' |                                        |
| RED1        | 5'-GATGGTGTAGTCCTCGTTGTG-3'    | DsRed gene fragment, 368 bp            |
| RED2        | 5'-GACTACTTGAAGCTGTCCCTCC-3'   |                                        |
| RED3        | 5'-CCGGGGTGAGCAAGGGCGAGG-3'    | mCherry gene fragment, 698 bp          |
| RED4        | 5'-TCTAGAGCCGCCGGTGGAGTG-3'    |                                        |
| NEO1        | 5'-CGGGTAGCCAACGCTATGTCC-3'    | NEO gene fragment, 772 bp              |
| NEO2        | 5'-GGACGACCCGGTCATACCTTC-3'    |                                        |
| H3-1        | 5'-AGTCATGTTGATTGAGGTGT-3'     | Fragment of H3 gene promoter, 1493 bp  |
| H3-2        | 5'GGCCATTGTGATTGATTTGTG-3'     |                                        |
| PNMcherryA1 | 5'TCGGCGCGTTCGTACTGTTCC-3'     | PNMcherryA gene fragment, 668bp        |
| PNMcherryA2 | 5'ATGGTGAGCAAGGGCGAGGAG-3'     |                                        |

Table S2. PCR amplification information

| Names       | Reaction procedure                                                                                                                             |
|-------------|------------------------------------------------------------------------------------------------------------------------------------------------|
| HPH52       | 95°C-Pre-denaturation 3 min, 95°C-Denaturation 15s, 60°C-Annealing 15s, 72°C-Extend 90s-30 cycles, 72 °C extended 5 min, 4°C-for preservation. |
| HPH34       |                                                                                                                                                |
| MPG11       | 95°C-Pre-denaturation 3 min, 95°C-Denaturation 15s, 56°C-Annealing 15s, 72°C-Extend 90s-30 cycles, 72 °C extended 5 min, 4°C-for preservation. |
| MPG12       |                                                                                                                                                |
| GFP-CHK1    | 95°C-Pre-denaturation 3 min, 95°C-Denaturation 15s, 60°C-Annealing 15s, 72°C-Extend 90s-30 cycles, 72 °C extended 5 min, 4°C-for preservation. |
| GFP-CHK2    |                                                                                                                                                |
| RED1        | 95°C-Pre-denaturation 3 min, 95°C-Denaturation 15s, 56°C-Annealing 15s, 72°C-Extend 90s-30 cycles, 72 °C extended 5 min, 4°C-for preservation. |
| RED2        |                                                                                                                                                |
| RED3        | 95°C-Pre-denaturation 3 min, 95°C-Denaturation 15s, 61°C-Annealing 15s, 72°C-Extend 90s-30 cycles, 72 °C extended 5 min, 4°C-for preservation. |
| RED4        |                                                                                                                                                |
| NEO1        | 95°C-Pre-denaturation 3 min, 95°C-Denaturation 15s, 58°C-Annealing 15s, 72°C-Extend 90s-30 cycles, 72 °C extended 5 min, 4°C-for preservation. |
| NEO2        |                                                                                                                                                |
| H3-1        | 95°C-Pre-denaturation 3 min, 95°C-Denaturation 15s, 53°C-Annealing 15s, 72°C-Extend 90s-30 cycles, 72 °C extended 5 min, 4°C-for preservation. |
| H3-2        |                                                                                                                                                |
| PNMcherryA1 | 95°C-Pre-denaturation 3 min, 95°C-Denaturation 15s, 58°C-Annealing 15s, 72°C-Extend 90s-30 cycles, 72 °C extended 5 min, 4°C-for preservation. |
| PNMcherryA2 |                                                                                                                                                |
